# Supplementary material
Source: PubMed Central journal article supplement (PMC4656129)

**A** Telencephalon quantitative scores

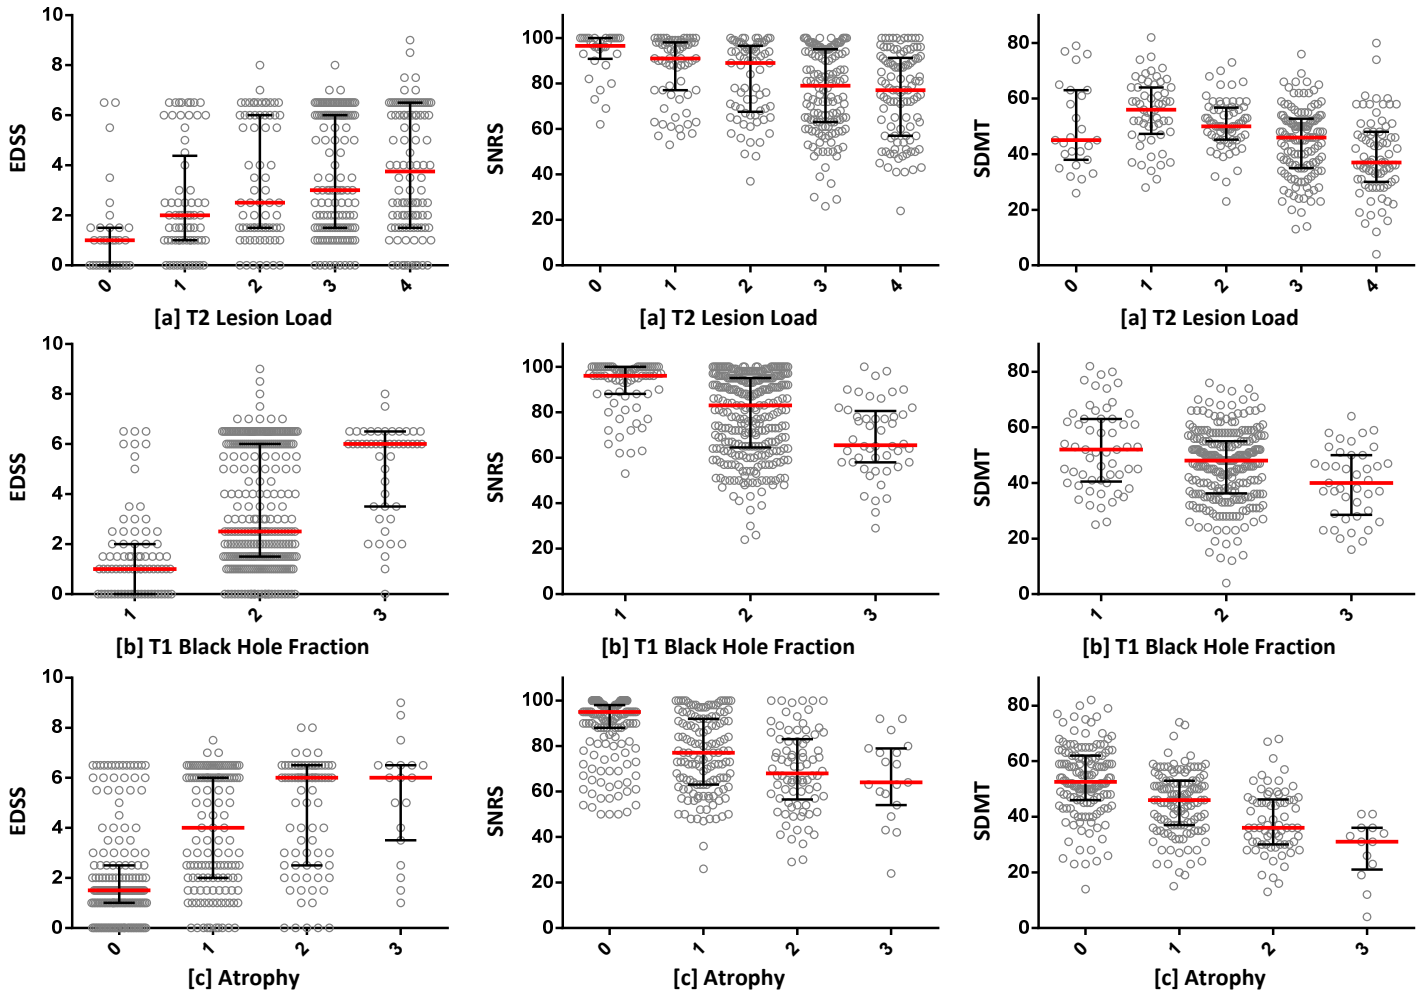

**B Telencephalon qualitative scores**

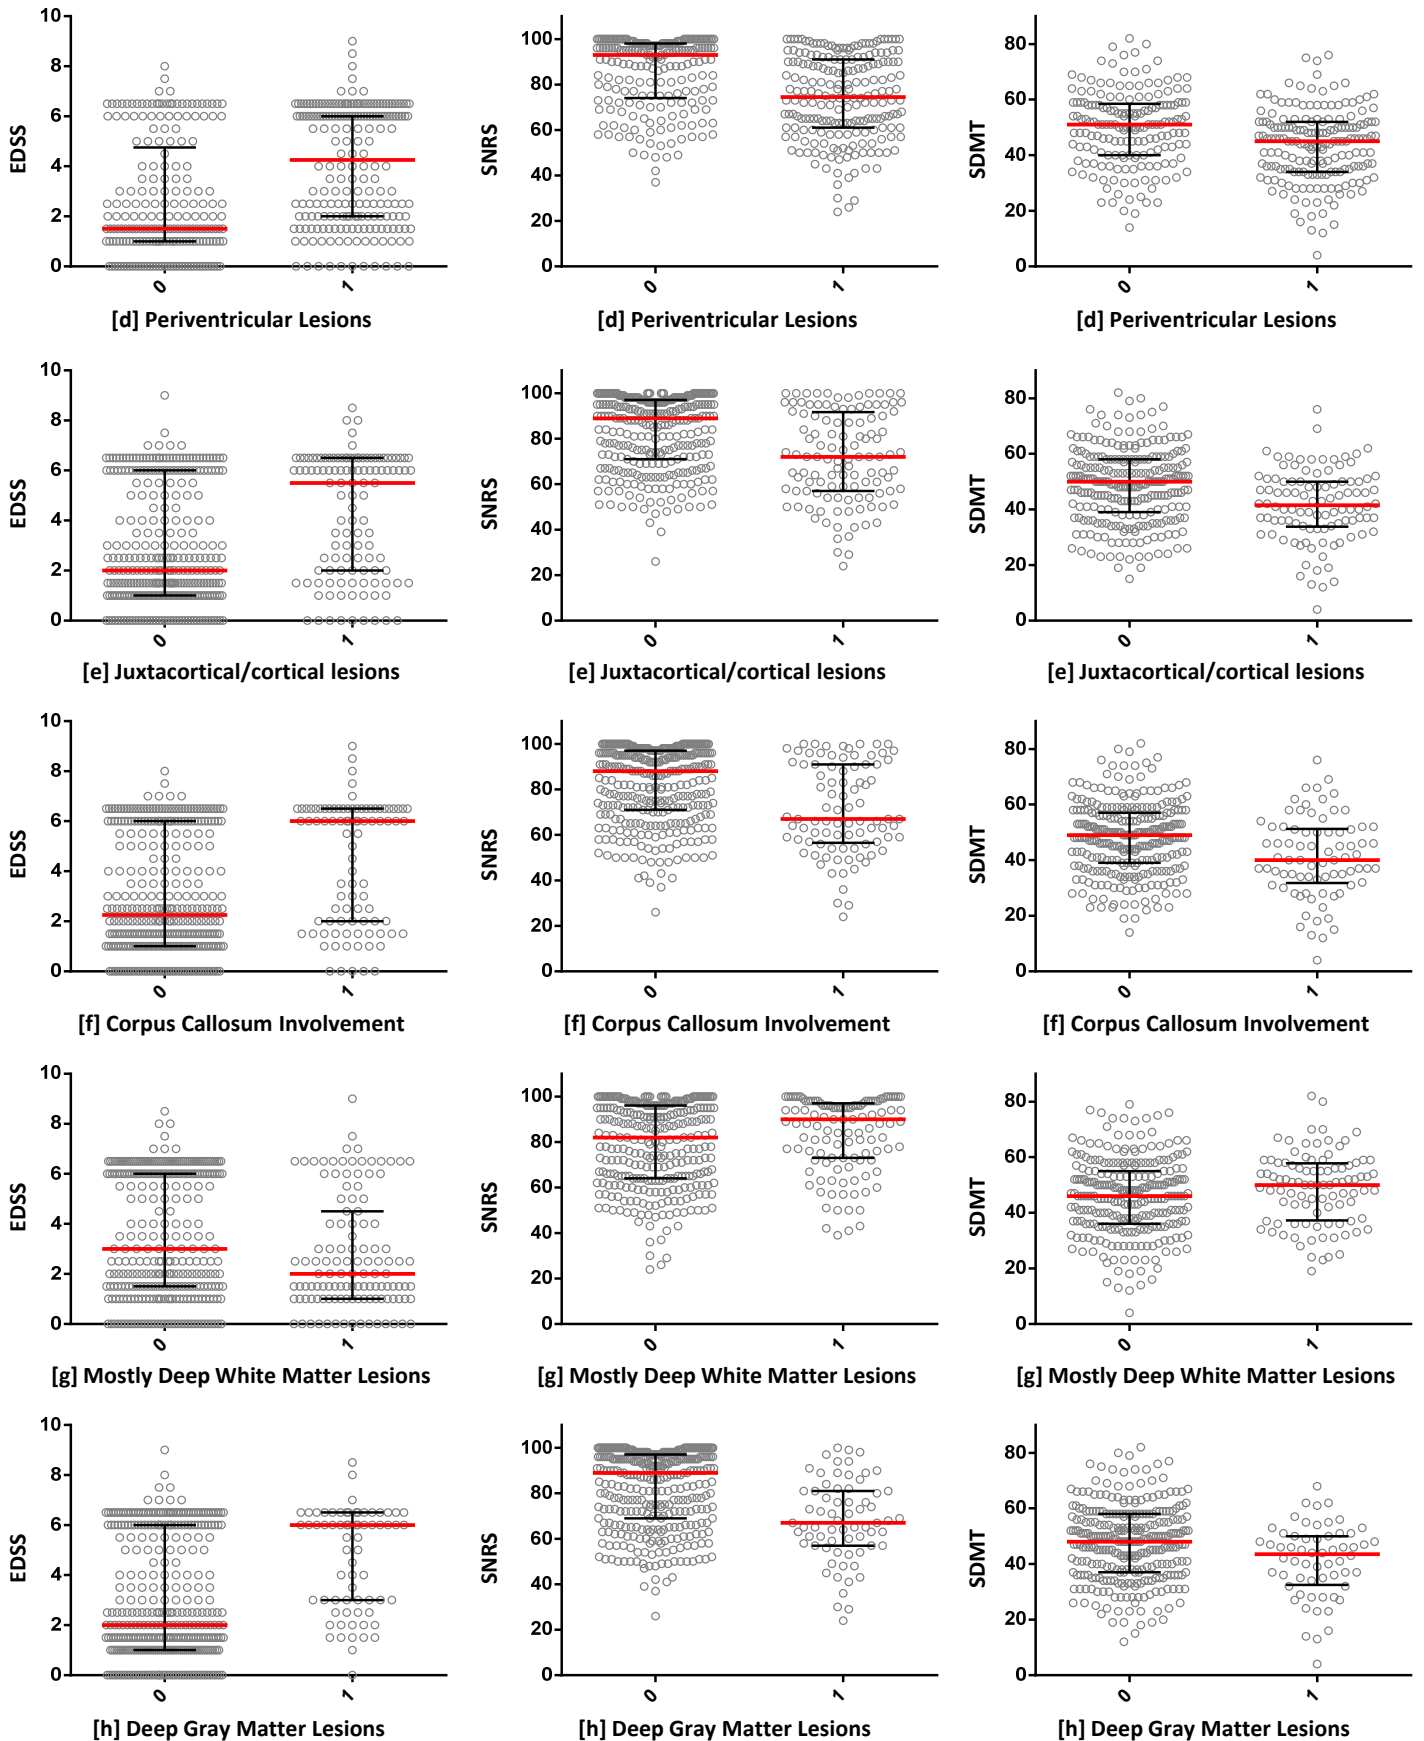

### C Infratentorial lesion load scores

### Supplementary Figure 1

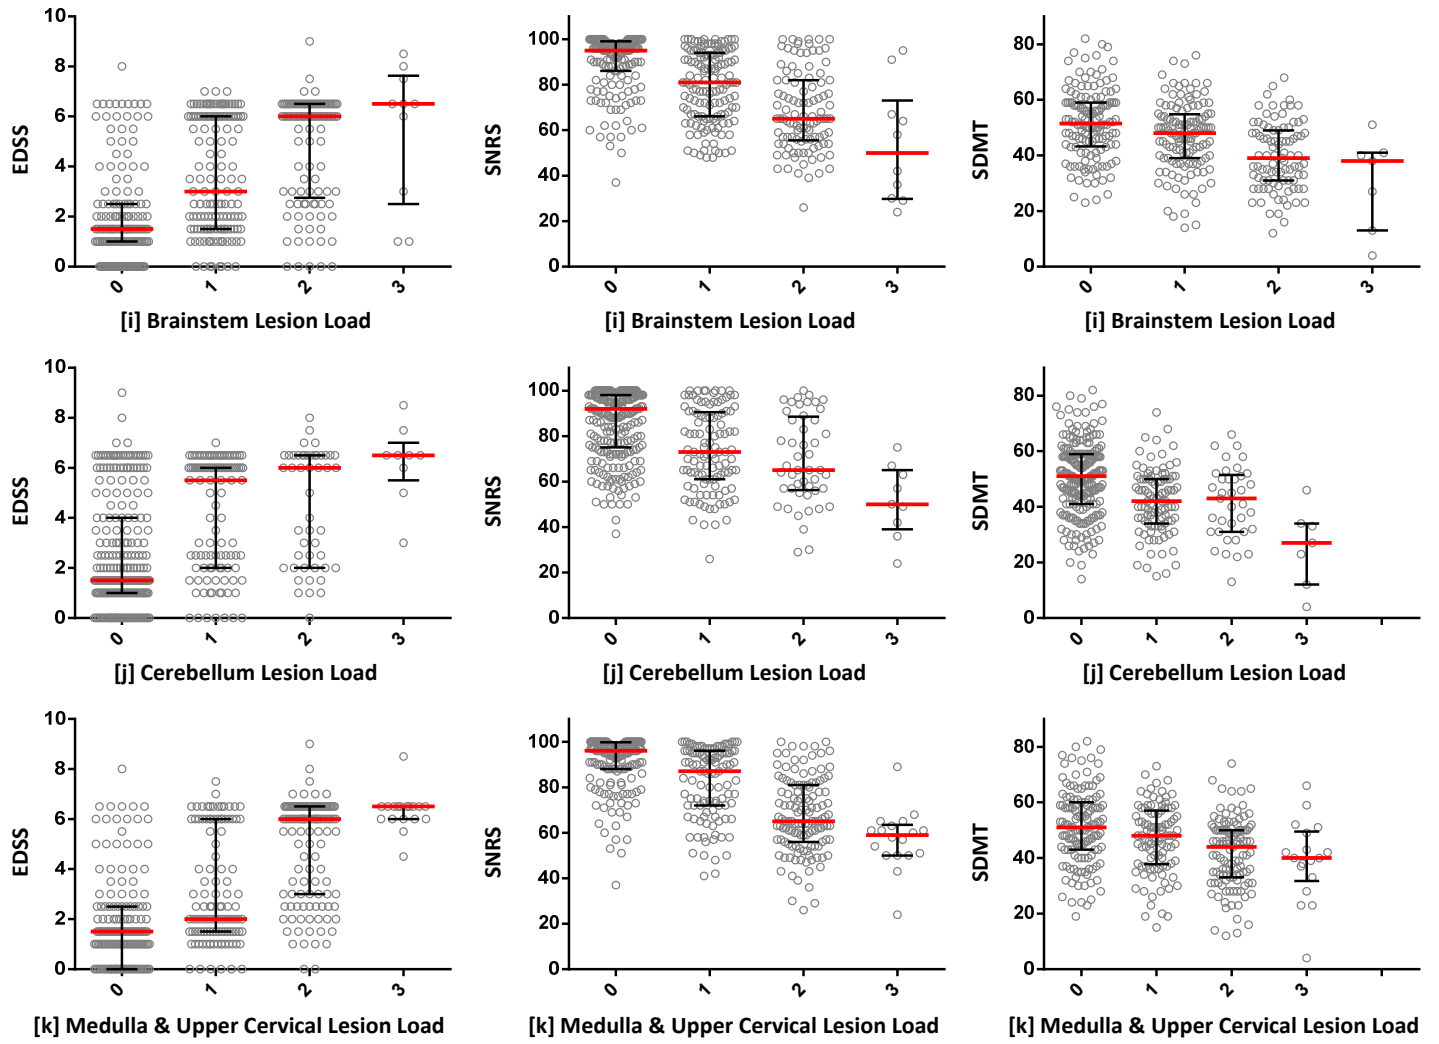

**D** Infratentorial atrophy scores

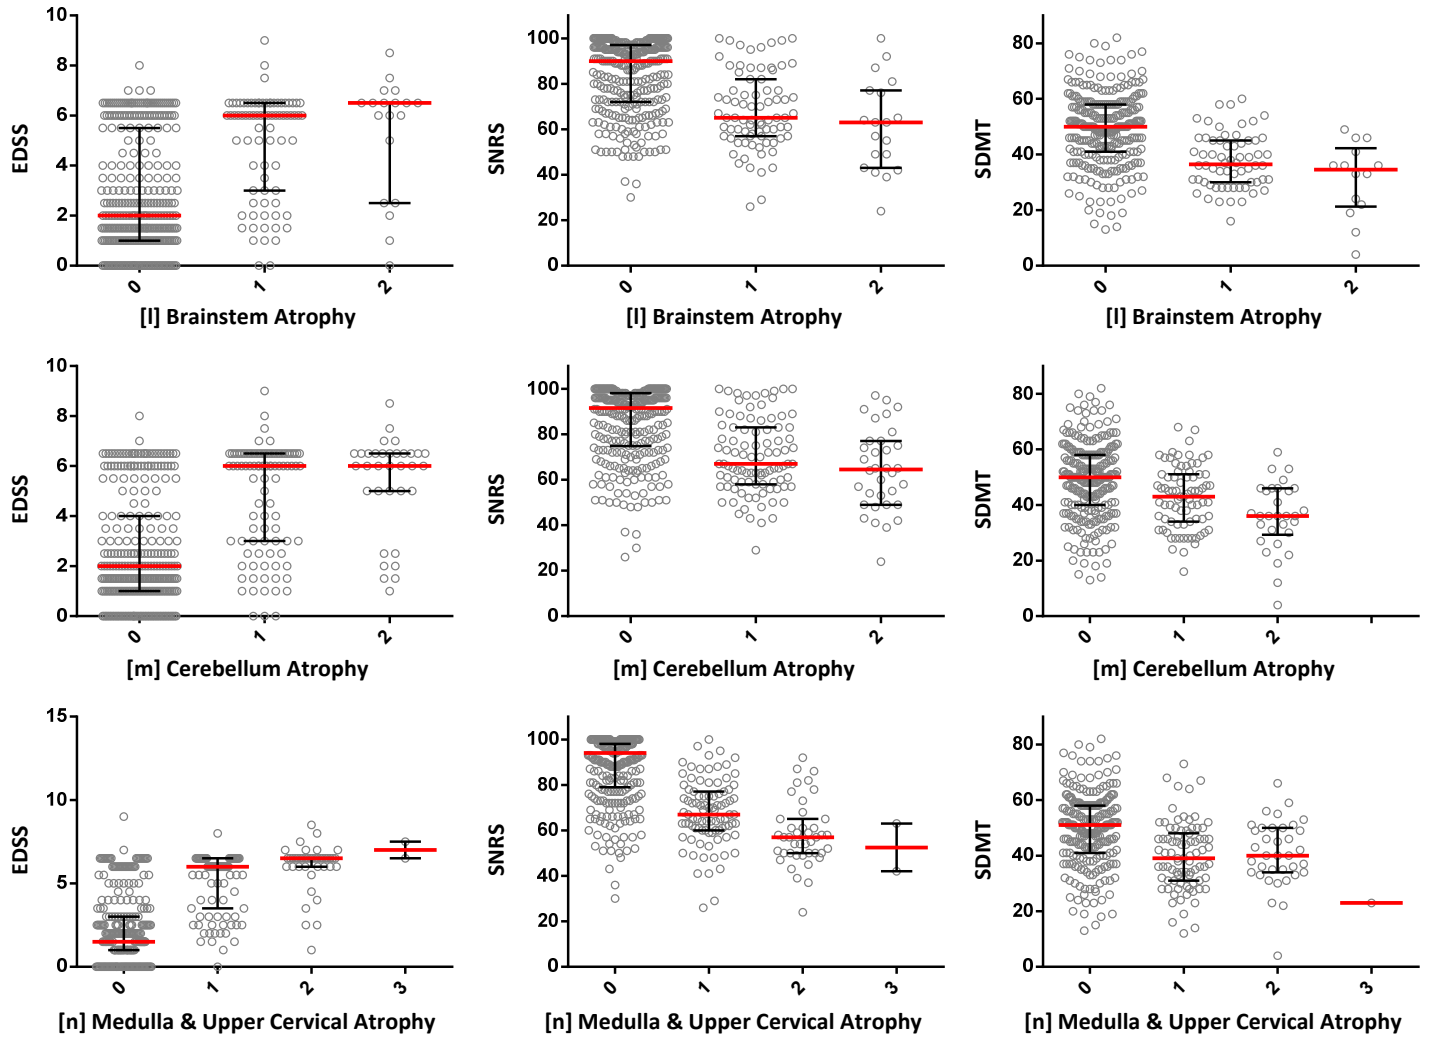

**E** Contrast-enhancing lesions score

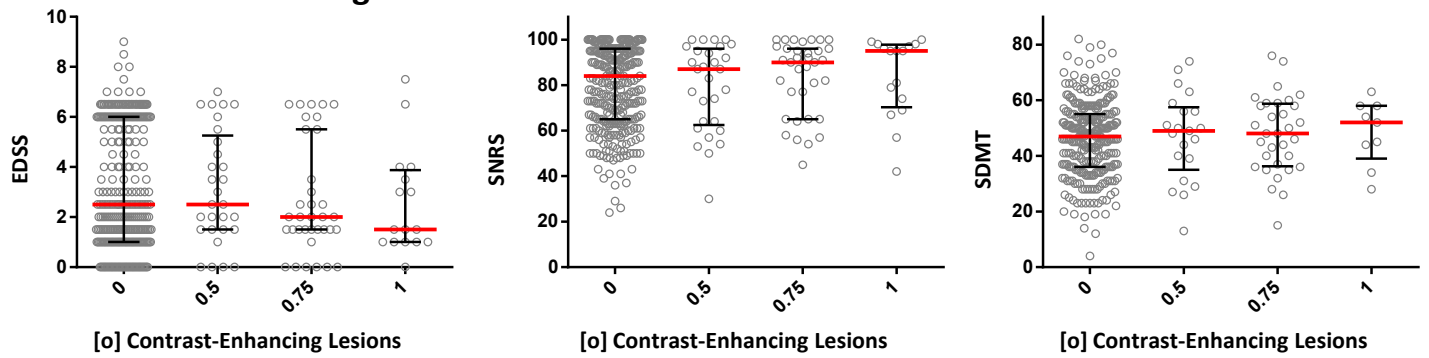

Supplement: NIHMS722495-supplement-3.pdf [file NIHMS722495-supplement-3.pdf]
