# Supplementary material
Source: PubMed Central journal article supplement (PMC4656129)
Supplement: NIHMS722495-supplement-4.pdf [file NIHMS722495-supplement-4.pdf]

# Supplementary Figure 2

**A**

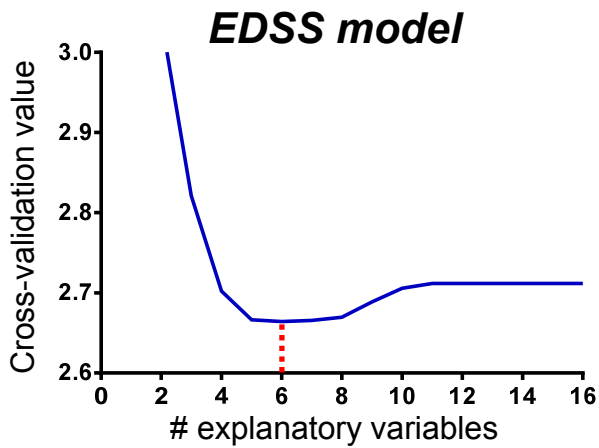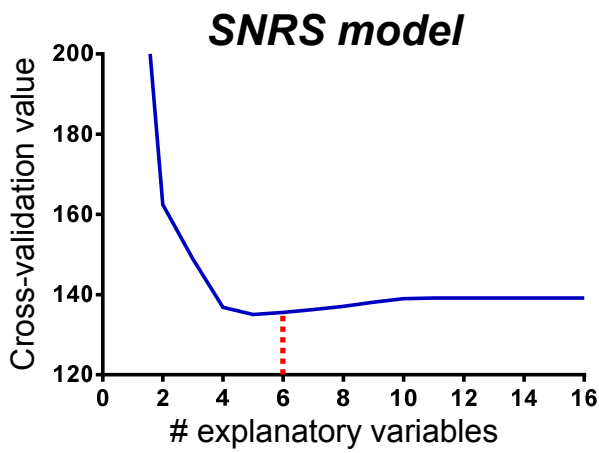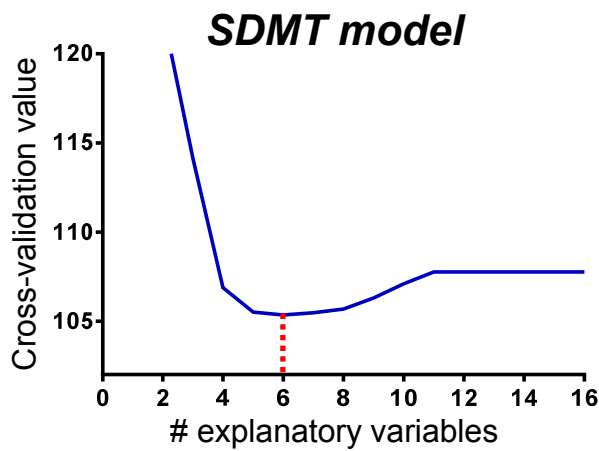

**B**

| explanatory variables order | COMRIS-PDO |            | COMRIS-CDO |
|-----------------------------|------------|------------|------------|
|                             | EDSS model | SNRS model | SDMT model |
| 1                           | age        | age        | age        |
| 2                           | k          | k          | c          |
| 3                           | n          | n          | a          |
| 4                           | i          | i          | i          |
| 5                           | m          | c          | j          |
| 6                           | c          | h          | h          |
| 7                           | g          | f          | l          |
| 8                           | b          | m          | g          |
| 9                           | e          | j          | f          |
| 10                          | f          | e          | e          |
| 11                          | h          | g          | n          |
| 12                          | a          | a          | b          |
| 13                          | d          | b          | d          |
| 14                          | j          | d          | k          |
| 15                          | l          | l          | m          |
| 16                          | o          | o          | o          |

- [a] T2 lesion load
- [b] T1 black hole fraction
- [c] Atrophy
- [d] Periventricular lesions
- [e] Juxtacortical/cortical lesions
- [f] Corpus Callosum involvement
- [g] Mostly deep white matter lesions
- [h] Deep grey matter lesions
- [i] Brainstem lesion load
- [j] Cerebellum lesion load
- [k] Medulla & Upper Cervical lesion load
- [l] Brainstem atrophy
- [m] Cerebellum atrophy
- [n] Medulla & Upper Cervical atrophy
- [o] Contrast-enhancing lesion load
